# Supplementary material for: Exotic Plants Used by the Hmong in Thailand
Source: PubMed Central journal article supplement (PMC6918319; doi:10.3390/plants8110500), 2019-11-14
Supplement: plants-08-00500-s001.pdf [file plants-08-00500-s001.pdf]

**Table S1.** Alphabetical listing of 69 exotic species used by the Hmong in six villages in Nan province in northern Thailand.

For each species the following information is provided: 1. Scientific name and author, family and number of voucher specimens deposited in Herbarium QBG at the Queen Sirikit Botanical Garden in Chiang Mai, Thailand. 2. The geographic origin of the species according to the scientific literature. 3. Use category following Cook (1995) for non-medicinal categories [105] and the WHO Classification for medicinal categories (<https://www.who.int/classifications/icd/en/>). 4. The application and treatment as observed in the field work for the present study. 5. Preparation and application of the exotic species according to field work for the present study.

| <b>Scientific name</b> (Family and Varangrat Nguanchoo voucher number, all deposited in the QBG herbarium) | <b>Geographic origin</b> | <b>Use category</b> | <b>Application/ Treatment</b>                                  | <b>Preparation and application</b>                    |
|------------------------------------------------------------------------------------------------------------|--------------------------|---------------------|----------------------------------------------------------------|-------------------------------------------------------|
| <i>Aloe vera</i> (L.) Burm.f.<br>(Xanthorrhoeaceae, no voucher)                                            | Africa                   | Medicine            | Burn, Poisoning due to bites and stings                        | Gel used for topical use by liniment                  |
| <i>Alternanthera bettzickiana</i> (Regel)<br>G.Nicholson<br>(Amaranthaceae, 747, 883)                      | America                  | Medicine            | Blood tonic, Amenorrhoea, Dysmenorrhoea, Urinary tract disease | Decoction for orally drinking                         |
|                                                                                                            |                          |                     | Bruised                                                        | Pound & burn for topical use by poultice              |
|                                                                                                            |                          |                     | Fever                                                          | Cooked by mixed with egg and steamed for orally eaten |
|                                                                                                            |                          |                     | Tonic                                                          | Cooked by boiled with chicken soup for orally eaten   |
| <i>Alternanthera brasiliana</i> (L.)<br>Kuntze. (Amaranthaceae, 633)                                       | America                  | Medicine            | Itchy rash                                                     | Decoction for bath                                    |
|                                                                                                            |                          |                     | Sprain (strain)                                                | Pound & burn for topical use by poultice              |
|                                                                                                            |                          |                     | Lower abdomen pain caused by retarded ejaculation              | Decoction for orally drinking                         |
|                                                                                                            |                          |                     | Tonic                                                          | Cooked by boiled with chicken soup for orally eaten   |
|                                                                                                            |                          |                     | Uterine prolapsed                                              | Burn for seat on                                      |
|                                                                                                            | America                  | Food                | Vegetable                                                      | Cooked                                                |
|                                                                                                            | America                  | Food                | Vegetable                                                      | Cooked                                                |

| Scientific name (Family and Varangrat Nguanchoo voucher number, all deposited in the QBG herbarium) | Geographic origin             | Use category | Application/ Treatment                                                  | Preparation and application                           |
|-----------------------------------------------------------------------------------------------------|-------------------------------|--------------|-------------------------------------------------------------------------|-------------------------------------------------------|
| <i>Amaranthus spinosus</i> L.<br>(Amaranthaceae, 625)                                               |                               | Animal food  | Animal food_Pig                                                         | Boiled                                                |
| <i>Anethum graveolens</i> L.<br>(Apiaceae, 676)                                                     | Africa to Asia                | Medicine     | Aphthous ulcer, Chickenpox                                              | Decoction for orally drinking                         |
|                                                                                                     |                               |              | Chickenpox                                                              | Cooked by boiled with chicken soup for orally eaten   |
|                                                                                                     |                               |              | Fever (children)                                                        | Burn for sauna or decoction for orally drinking       |
|                                                                                                     |                               | Food         | Food additive                                                           | Herbs and spices                                      |
| <i>Annona squamosa</i> L.<br>(Annonaceae, 780)                                                      | America                       | Medicine     | Cancer                                                                  | Decoction for orally drinking                         |
|                                                                                                     |                               | Food         | Fruit                                                                   | Raw                                                   |
| <i>Artemisia lactiflora</i> Wall. ex DC.<br>(Asteraceae, 683, 714, 916)                             | Asia (China)                  | Medicine     | Diarrhea                                                                | Decoction for orally drinking                         |
|                                                                                                     |                               |              | Postpartum recovery (Blood tonic), Tonic                                | Cooked by boiled with chicken soup for orally eaten   |
| <i>Artemisia vulgaris</i> L.<br>(Asteraceae, 680)                                                   | Africa, Europe, Asia to China | Medicine     | Headache, Wound                                                         | Pound for topical use by poultice                     |
|                                                                                                     |                               |              | Fever, Malaria                                                          | Cooked by mixed with egg and steamed for orally eaten |
|                                                                                                     |                               |              | Fever, Relief muscle pain                                               | Decoction for orally drinking                         |
|                                                                                                     |                               |              | Liver disorder                                                          | Pound & burn for topical use by poultice              |
| <i>Artocarpus heterophyllus</i> Lam.<br>(Moraceae, no voucher)                                      | India to Malaya Peninsula     | Medicine     | Diarrhea                                                                | Decoction for orally drinking                         |
|                                                                                                     |                               |              | Lactation stimulant                                                     | Cooked by boiled with pork soup for orally eaten      |
|                                                                                                     |                               | Food         | Fruit                                                                   | Raw                                                   |
| <i>Ayapana triplinervis</i> (Vahl)<br>R.M.King & H.Rob.<br>(Asteraceae, 721)                        | America                       | Medicine     | Aphthous ulcer                                                          | Raw for chewing                                       |
|                                                                                                     |                               | Food         | Vegetable                                                               | Raw                                                   |
| <i>Bidens biternata</i> (Lour.) Merr. & Sherff<br>(Asteraceae, 645)                                 | America                       | Medicine     | Aphthous ulcer, Calculus, Chickenpox, Cough, Fever, Gonorrhoea, Malaria | Decoction for orally drinking                         |

| Scientific name (Family and Varangrat Nguanchoo voucher number, all deposited in the QBG herbarium) | Geographic origin                                         | Use category    | Application/ Treatment                                                                  | Preparation and application                          |
|-----------------------------------------------------------------------------------------------------|-----------------------------------------------------------|-----------------|-----------------------------------------------------------------------------------------|------------------------------------------------------|
|                                                                                                     |                                                           |                 | Postpartum recovery (food allergic reaction)                                            | Cooked by boiled with chicken soup for orally eaten  |
| <i>Bryophyllum pinnatum</i> (Lam.) Oken (Crassulaceae, 709, 917, 1058)                              | Africa                                                    | Medicine        | Abscess, Arthralgia, Bone fractures, Bone pain, Bruised, Flatulence, Inflammation wound | Pound for topical use by poultice                    |
|                                                                                                     |                                                           |                 | Blood tonic                                                                             | Decoction for orally drinking                        |
|                                                                                                     |                                                           |                 | Tonic                                                                                   | Cooked by boiled with chicken soup for orally eaten  |
| <i>Buddleja paniculata</i> Wall. (Scrophulariaceae, no voucher)                                     | Asia                                                      | Medicine        | Abdominal pain during pregnancy                                                         | Hot infusion for orally drinking                     |
|                                                                                                     |                                                           |                 | Calculus, Leucorrhoea, Female sterility, Peptic ulcer                                   | Decoction for orally drinking                        |
|                                                                                                     |                                                           |                 | Headache                                                                                | Pound for topical use by poultice                    |
| <i>Caladium bicolor</i> (Aiton) Vent. (Araceae, 789)                                                | America                                                   | Medicine        | Peptic ulcer                                                                            | Cooked by boiled with chicken soup for orally eaten  |
|                                                                                                     |                                                           |                 | Relief muscle pain                                                                      | Crush for topical use by liniment                    |
|                                                                                                     |                                                           |                 | Stomachache                                                                             | Decoction for orally drinking                        |
|                                                                                                     |                                                           | Animal Medicine | Animal Medicine_Pus for buffalo, cow                                                    | Pound for topical use by poultice                    |
|                                                                                                     |                                                           | Social use      | Ritual plant                                                                            | Treating pain from black magic by pound for liniment |
| Sacred plant                                                                                        | Protecting from evil spirit and disease by grown at house |                 |                                                                                         |                                                      |
| <i>Canna indica</i> L. (Cannaceae, 679, 800, 991, 1054)                                             | America                                                   | Medicine        | Appendix, Flatulence, Urinary tract disease                                             | Grind or raw for orally eaten                        |
|                                                                                                     |                                                           |                 | Appendix, Urinary tract disease, Calculus                                               | Hot infusion for orally drinking                     |

| Scientific name (Family and Varangrat Nguanchoo voucher number, all deposited in the QBG herbarium) | Geographic origin | Use category | Application/ Treatment                              | Preparation and application                         |
|-----------------------------------------------------------------------------------------------------|-------------------|--------------|-----------------------------------------------------|-----------------------------------------------------|
|                                                                                                     |                   |              | Blood tonic, Flatulence, Kidney disorder            | Decoction for orally drinking                       |
|                                                                                                     |                   |              | Tonic                                               | Cooked by boiled with chicken soup for orally eaten |
|                                                                                                     |                   | Food         | Carbohydrate source                                 | Burned                                              |
| <i>Carica papaya</i> L. (Caricaceae, 904)                                                           | America           | Medicine     | Gonorrhoea                                          | Decoction for orally drinking                       |
|                                                                                                     |                   |              | Lactation stimulant                                 | Cooked by boiled with chicken soup for orally eaten |
|                                                                                                     |                   |              | Peptic ulcer                                        | Raw for orally eaten                                |
|                                                                                                     |                   | Food         | Fruit                                               | Raw                                                 |
|                                                                                                     |                   | Animal food  | Animal food_Pig                                     | Raw                                                 |
| <i>Celosia argentea</i> L. (Amaranthaceae, 652, 923)                                                | Americas          | Medicine     | Amenorrhoea, Dysmenorrhea, Female fertility         | Decoction for orally drinking                       |
|                                                                                                     |                   |              | Tonic                                               | Cooked by boiled with chicken soup for orally eaten |
| <i>Chromolaena odorata</i> (L.) R.M.King & H.Rob. (Asteraceae, 624, 970)                            | America           | Medicine     | Burn, Hemostatic, Wound                             | Pound for topical use by poultice                   |
|                                                                                                     |                   |              | Fever                                               | Decoction for orally drinking                       |
| <i>Chrysanthemum indicum</i> L. (Asteraceae, 710, 918, 1053)                                        | China and Japan   | Medicine     | Tonic                                               | Cooked by boiled with chicken soup for orally eaten |
| <i>Citrus maxima</i> (Burm.) Merr. (Rutaceae, no voucher)                                           | China             | Food         | Fruit                                               | Raw                                                 |
| <i>Crassocephalum crepidioides</i> (Benth.) S. Moore. (Asteraceae, 622)                             | Africa            | Medicine     | Ringworm infection                                  | Crush for topical use by poultice                   |
|                                                                                                     |                   | Food         | Vegetable                                           | Boiled                                              |
|                                                                                                     |                   | Animal food  | Pig                                                 | Boiled or raw                                       |
| <i>Crinum × amabile</i> Donn ex Ker Gawl. (Amaryllidaceae, 855)                                     | Asia              | Medicine     | Abscesses, Bone fractures, Bruised, Sprain (strain) | Pound & burn for topical use by poultice            |
|                                                                                                     |                   |              | Flatulence                                          | Hot infusion for orally drinking                    |
|                                                                                                     |                   |              | Peptic ulcer, Stomachache                           | Decoction for orally drinking                       |

| <b>Scientific name</b> (Family and Varangrat Nguanchoo voucher number, all deposited in the QBG herbarium) | <b>Geographic origin</b>         | <b>Use category</b> | <b>Application/ Treatment</b>                                               | <b>Preparation and application</b>                                                            |
|------------------------------------------------------------------------------------------------------------|----------------------------------|---------------------|-----------------------------------------------------------------------------|-----------------------------------------------------------------------------------------------|
| <i>Cucurbita moschata</i> Duchesne<br>(Cucurbitaceae, 717)                                                 | America                          | Food                | Vegetable                                                                   | Cooked                                                                                        |
|                                                                                                            |                                  | Animal food         | Animal food_Pig                                                             | Boiled                                                                                        |
| <i>Dianella ensifolia</i> (L.) DC.<br>(Xanthorrhoeaceae, no voucher)                                       | Australia,<br>Asia and<br>Africa | Medicine            | Amenorrhoea, Cough                                                          | Decoction for orally drinking                                                                 |
|                                                                                                            |                                  | Social use          | Ritual plant                                                                | Used in worship house spirit ritual (Na Jong) by tied with incense and candle and keep a year |
| <i>Eryngium foetidum</i> L.<br>(Apiaceae, 711)                                                             | America                          | Medicine            | Burn                                                                        | Pound for topical use by poultice                                                             |
|                                                                                                            |                                  |                     | Headache, Fever                                                             | Decoction for orally drinking                                                                 |
|                                                                                                            |                                  | Food                | Vegetable                                                                   | Cooked or raw                                                                                 |
| <i>Euphorbia tithymaloides</i> L.<br>(Euphorbiaceae, 704, 992, 1047)                                       | America                          | Medicine            | Lactation stimulant, Postpartum recovery (blood tonic)                      | Cooked by boiled with chicken soup for orally eaten                                           |
|                                                                                                            |                                  |                     | Lactation stimulant                                                         | Crush for topical use by liniment                                                             |
| <i>Gladiolus hortulanus</i> L.H. Bailey<br>(Iridaceae, 792, 815, 1003)                                     | Africa                           | Medicine            | Bruised, Poisoning due to bite and sting (centipede, scorpion, snake bites) | Pound for topical use by poultice                                                             |
|                                                                                                            |                                  |                     | Cough                                                                       | Decoction for orally drinking                                                                 |
|                                                                                                            |                                  | Social use          | Ritual plant                                                                | Treating pain from black magic by pound for liniment or soul calling by liniment at body      |
|                                                                                                            |                                  |                     | Sacred plant                                                                | Protecting from weapon by putted in pouch                                                     |
| <i>Hibiscus sabdariffa</i> L.<br>(Malvaceae, 621, 821)                                                     | Africa                           | Medicine            | Abscesses                                                                   | Pound for topical use by poultice                                                             |
|                                                                                                            |                                  |                     | Aphthous ulcer, Blood tonic, Urinary tract disease                          | Decoction for orally drinking                                                                 |
|                                                                                                            |                                  | Food                | Vegetable                                                                   | Boiled or raw                                                                                 |
| <i>Hippeastrum x johnsonii</i> Bury<br>(Amaryllidaceae, no voucher)                                        | Africa                           | Medicine            | Appendix, Stomachache                                                       | Raw for orally eaten                                                                          |
|                                                                                                            |                                  |                     | Cough                                                                       | Decoction for orally drinking                                                                 |
|                                                                                                            |                                  | Social use          | Sacred plant                                                                | Protecting from evil spirit by grown at house                                                 |

| Scientific name (Family and Varanrat Nguanchoo voucher number, all deposited in the QBG herbarium) | Geographic origin  | Use category | Application/ Treatment                                                                                      | Preparation and application                                 |
|----------------------------------------------------------------------------------------------------|--------------------|--------------|-------------------------------------------------------------------------------------------------------------|-------------------------------------------------------------|
| <i>Impatiens balsamina</i> L.<br>(Balsaminaceae, 912)                                              | Asia               | Medicine     | Amenorrhoea, Dysmenorrhea, Female fertility, Fever, Labor induction, Postpartum recovery, Uterine prolapsed | Decoction for orally drinking                               |
|                                                                                                    |                    |              | Burn                                                                                                        | Pound for topical use by poultice                           |
| <i>Iresine herbstii</i> Hook.<br>(Amaranthaceae, 687, 715, 933)                                    | America            | Medicine     | Amenorrhoea, Dysmenorrhea, Blood tonic                                                                      | Decoction for orally drinking                               |
|                                                                                                    |                    |              | Bruised                                                                                                     | Pound for topical use by poultice                           |
|                                                                                                    |                    |              | Tonic                                                                                                       | Cooked by boiled with chicken soup for orally eaten         |
| <i>Jatropha curcas</i> L.<br>(Euphorbiaceae, 616, 727, 781, 921)                                   | America            | Medicine     | Apthous ulcer, Burn, Itchy rash, Wound                                                                      | latex for topical use by liniment                           |
|                                                                                                    |                    |              | Foot dermatitis                                                                                             | Decoction for orally drinking                               |
|                                                                                                    |                    |              | Tendon disorders (tendon pain)                                                                              | Pound for topical use by poultice                           |
|                                                                                                    |                    | Material     | Fence                                                                                                       | Living plant grown at house                                 |
| <i>Jatropha gossypifolia</i> L.<br>(Euphorbiaceae, 881)                                            | America            | Medicine     | Amenorrhea                                                                                                  | Decoction for orally drinking                               |
|                                                                                                    |                    |              | Hemorrhoids, Postpartum recovery (Uterine subinvolution)                                                    | Burned for seating on                                       |
|                                                                                                    |                    |              | Headache, Postpartum recovery (Uterine subinvolution)                                                       | Burned for topical use by plaster                           |
|                                                                                                    |                    | Social use   | Sacred plant                                                                                                | Protecting from evil spirit by grown at house near the door |
| <i>Kalanchoe cf. ceratophylla</i> Haw.<br>(Crassulaceae, 685, 958, 993)                            | India, Asia, china | Medicine     | Chest pain                                                                                                  | Decoction for orally drinking                               |
|                                                                                                    |                    |              | Food allergic reaction, Morning sickness                                                                    | Cooked by mixed with egg and steamed for orally eaten       |
|                                                                                                    |                    |              | Lactation stimulant, Relief muscle pain, Tonic                                                              | Cooked by boiled with chicken soup for orally eaten         |
|                                                                                                    | Africa             | Medicine     | Diphtheria                                                                                                  | Hot infusion for orally drinking                            |

| <b>Scientific name</b> (Family and Varangrat Nguanchoo voucher number, all deposited in the QBG herbarium) | <b>Geographic origin</b>                            | <b>Use category</b>                                     | <b>Application/ Treatment</b>                   | <b>Preparation and application</b>               |
|------------------------------------------------------------------------------------------------------------|-----------------------------------------------------|---------------------------------------------------------|-------------------------------------------------|--------------------------------------------------|
| <i>Lagenaria siceraria</i> (Molina) Standl.<br>(Cucurbitaceae, 854)                                        |                                                     |                                                         | Poisoning due to bite and sting (scorpion bite) | Pound for topical use by poultice                |
|                                                                                                            |                                                     | Material                                                | Dried                                           | Decoration, Water dipper                         |
| <i>Manihot esculenta</i> Crantz<br>(Euphorbiaceae, 955)                                                    | America                                             | Medicine                                                | Cough                                           | Decoction for orally drinking                    |
|                                                                                                            |                                                     | Animal food                                             | Animal food_Pig                                 | Boiled                                           |
|                                                                                                            |                                                     | Food                                                    | Vegetable                                       | Cooked                                           |
|                                                                                                            |                                                     |                                                         | Carbohydrate source                             | Burned or boiled                                 |
| <i>Mimosa pudica</i> L.<br>(Fabaceae, 602, 745, 796)                                                       | America                                             | Medicine                                                | Calculus, Diabetic, Dysmenorrhoea               | Decoction for orally drinking                    |
|                                                                                                            |                                                     |                                                         | Fever                                           | Pound for topical use by poultice                |
|                                                                                                            |                                                     |                                                         | Nicotine dependence                             | Mixed with tobacco for smoking                   |
|                                                                                                            |                                                     | Social use                                              | Ritual plant                                    | Soul calling by liniment at body                 |
|                                                                                                            |                                                     |                                                         | Sacred plant                                    | Protecting from evil spirit by putted in pouch   |
|                                                                                                            |                                                     | <i>Mirabilis jalapa</i> L.<br>(Nyctaginaceae, 872, 915) | America                                         | Medicine                                         |
| Bruised, Tonic                                                                                             | Cooked by boiled with chicken soup for orally eaten |                                                         |                                                 |                                                  |
| Burn                                                                                                       | Pound for topical use by poultice                   |                                                         |                                                 |                                                  |
| Sprain (strain)                                                                                            | Pound & burned for topical use by poultice          |                                                         |                                                 |                                                  |
| <i>Morus alba</i> L.<br>(Moraceae, 932)                                                                    | China                                               | Medicine                                                | Itchy rash                                      | Decoction for orally drinking                    |
|                                                                                                            |                                                     |                                                         | tonic                                           | Cooked by boiled with pork soup for orally eaten |
|                                                                                                            |                                                     | Food                                                    | Fruit                                           | Raw                                              |
| <i>Muntingia calabura</i> L.<br>(Muntingiaceae, 731)                                                       | America                                             | Food                                                    | Fruit                                           | Raw                                              |
| <i>Nicotiana tabacum</i> L.                                                                                | America                                             | Medicine                                                | Hemostatic                                      | Pound for topical use by poultice                |

| Scientific name (Family and Varangrat Nguanchoo voucher number, all deposited in the QBG herbarium) | Geographic origin                       | Use category | Application/ Treatment                                          | Preparation and application                           |
|-----------------------------------------------------------------------------------------------------|-----------------------------------------|--------------|-----------------------------------------------------------------|-------------------------------------------------------|
| (Solanaceae, 922, 953)                                                                              |                                         |              | Poisoning due to bite and sting (mosquito bites)                | Crush for topical use by liniment                     |
|                                                                                                     |                                         | Social use   | Tobacco                                                         | Dried for smoking                                     |
| <i>Ocimum africanum</i> Lour.<br>(Lamiaceae, 643)                                                   | Uncertain                               | Medicine     | Blood tonic                                                     | Raw for orally eaten                                  |
|                                                                                                     |                                         |              | Conjunctiva                                                     | Grind for drop into eyes                              |
|                                                                                                     |                                         |              | Liver disorder, Poisoning due to bite and sting (centipede)     | Pound for topical use by poultice                     |
|                                                                                                     |                                         | Food         | Food additive                                                   | Herbs and spices                                      |
| <i>Passiflora edulis</i> Sims<br>(Passifloraceae, 646)                                              | America                                 | Food         | Fruit                                                           | Raw                                                   |
|                                                                                                     |                                         |              | Vegetable                                                       | Cooked                                                |
| <i>Passiflora foetida</i> L.<br>(Passifloraceae, 975)                                               | America                                 | Food         | Fruit                                                           | Raw                                                   |
|                                                                                                     |                                         |              | Vegetable                                                       | Cooked                                                |
| <i>Phyllanthus acidus</i> (L.) Skeels<br>(Phyllanthaceae, no voucher)                               | America                                 | Food         | Fruit                                                           | Raw                                                   |
| <i>Plectranthus scutellarioides</i> (L.)<br>R.Br. (Lamiaceae, 682, 770)                             | Asia southward to Malesia and Australia | Medicine     | Flatulence (infant)                                             | Decoction for orally drinking                         |
|                                                                                                     |                                         |              | Liver disorder                                                  | Crush for topical use by liniment                     |
|                                                                                                     |                                         |              | Tonic                                                           | Cooked by boiled with chicken soup for orally eaten   |
| <i>Psidium guajava</i> L.<br>(Myrtaceae, 609)                                                       | America                                 | Medicine     | Diarrhea                                                        | Decoction for orally drinking or raw for orally eaten |
|                                                                                                     |                                         | Food         | Fruit                                                           | Raw                                                   |
| <i>Psophocarpus tetragonolobus</i> (L.)<br>DC. (Fabaceae, 778)                                      | Asia                                    | Medicine     | Chickenpox                                                      | Decoction for orally drinking                         |
|                                                                                                     |                                         | Food         | Vegetable                                                       | Cooked or raw                                         |
| <i>Sambucus canadensis</i> L.<br>(Adoxaceae, 655, 994, 1042)                                        | America                                 | Medicine     | Bruised, Burn, Bone fractures, Fever, Headache, Sprain (strain) | Pound for topical use by poultice                     |
|                                                                                                     |                                         |              | Sprain (strain)                                                 | Decoction for orally drinking                         |
|                                                                                                     |                                         |              | Tonic                                                           | Cooked by boiled with chicken soup for orally eaten   |



| <b>Scientific name</b> (Family and Varangrat Nguanchoo voucher number, all deposited in the QBG herbarium) | <b>Geographic origin</b> | <b>Use category</b> | <b>Application/ Treatment</b>                                                  | <b>Preparation and application</b>                      |
|------------------------------------------------------------------------------------------------------------|--------------------------|---------------------|--------------------------------------------------------------------------------|---------------------------------------------------------|
| <i>Sanchezia oblonga</i> Ruiz & Pav.<br>(Acanthaceae, 830, 879, 999, 1048)                                 | America                  | Medicine            | Arthralgia, Bone fractures, Bruised, Relief muscle pain, Sprain (strain)       | Pound for topical use by poultice                       |
|                                                                                                            |                          |                     | Bone fractures, Relief muscle pain                                             | Decoction for orally drinking                           |
|                                                                                                            |                          |                     | Fever                                                                          | Raw for orally eaten                                    |
|                                                                                                            |                          |                     | Relief muscle pain                                                             | Burn for topical use by plaster                         |
|                                                                                                            |                          |                     | Tonic                                                                          | Cooked by boiled with chicken soup for orally eaten     |
| <i>Sansevieria trifasciata</i> Prain<br>(Asparagaceae, 615)                                                | Africa                   | Social use          | Sacred plant                                                                   | Protecting from evil spirit and snake by grown at house |
| <i>Scoparia dulcis</i> L.<br>(Plantaginaceae, 608, 741, 777)                                               | America                  | Medicine            | Aphthous ulcer                                                                 | Raw for chewing or crush for topical use by liniment    |
|                                                                                                            |                          |                     | Cough                                                                          | Decoction for orally drinking                           |
| <i>Sechium edule</i> (Jacq.) Sw.<br>(Cucurbitaceae, 729)                                                   | America                  | Medicine            | Bone fractures                                                                 | Pound for topical use by poultice                       |
|                                                                                                            |                          | Food                | Vegetable                                                                      | Cooked                                                  |
| <i>Sedum sarmentosum</i> Bunge<br>(Crassulaceae, 706)                                                      | China                    | Medicine            | Female fertility                                                               | Decoction for orally drinking                           |
|                                                                                                            |                          |                     | Food for pregnancy, Morning sickness, Tonic                                    | Cooked by boiled with chicken soup for orally eaten     |
|                                                                                                            |                          |                     | Food for pregnancy, Respiration disorder in newborn (cough, suffocate, sputum) | Hot infusion for orally drinking                        |
|                                                                                                            |                          |                     | Food for pregnancy, Morning sickness                                           | Cooked by mixed with egg and steamed for orally eaten   |
| <i>Senna occidentalis</i> (L.) Link<br>(Fabaceae, 814)                                                     | America                  | Medicine            | Flatulence, Stomachache                                                        | Decoction for orally drinking                           |
|                                                                                                            |                          |                     | Food allergic reaction, Peptic ulcer                                           | Hot infusion for orally drinking                        |
| <i>Sesamum indicum</i> L.<br>(Pedaliaceae, 880)                                                            | Uncertain                | Medicine            | Cancer                                                                         | Grind or hot infusion for orally drinking               |

| Scientific name (Family and Varangrat Nguanchoo voucher number, all deposited in the QBG herbarium) | Geographic origin   | Use category | Application/ Treatment                                                            | Preparation and application                                        |
|-----------------------------------------------------------------------------------------------------|---------------------|--------------|-----------------------------------------------------------------------------------|--------------------------------------------------------------------|
|                                                                                                     |                     | Food         | Dessert                                                                           | Raw                                                                |
| <i>Solanum americanum</i> Mill.<br>(Solanaceae, 736, 878)                                           | America             | Medicine     | Fever, Stomachache                                                                | Decoction for orally drinking                                      |
|                                                                                                     |                     | Food         | Vegetable                                                                         | Cooked or raw                                                      |
| <i>Solanum lycopersicum</i> L.<br>(Solanaceae, 612)                                                 | America             | Food         | Vegetable                                                                         | Cooked or raw                                                      |
| <i>Solanum melongena</i> L.<br>(Solanaceae, 607, 724, 919)                                          | India and Sri Lanka | Medicine     | Toothache                                                                         | Cooked by boiled with chicken soup for orally eaten                |
|                                                                                                     |                     | Food         | Fruit                                                                             | Cooked or raw                                                      |
| <i>Solanum torvum</i> Sw.<br>(Solanaceae, 618, 787)                                                 | India               | Medicine     | Liver disorder                                                                    | Decoction for orally drinking or pound for topical use by poultice |
|                                                                                                     |                     | Food         | Fruit                                                                             | Cooked or raw                                                      |
| <i>Spermacoce ocymoides</i> Burm.f.<br>(Rubiaceae, 935)                                             | Asia                | Medicine     | Poisoning due to bite and sting (snake bites)                                     | Pound for topical use by poultice                                  |
| <i>Tagetes erecta</i> L.<br>(Asteraceae, 913)                                                       | America             | Medicine     | Amenorrhoea, Aphthous ulcer, Dysmenorrhoea, Female fertility, Postpartum recovery | Decoction for orally drinking                                      |
| <i>Talinum fruticosum</i> (L.) Juss.<br>(Talinaceae, 751)                                           | America             | Medicine     | Tonic                                                                             | Cooked by boiled with chicken soup for orally eaten                |
| <i>Talinum paniculatum</i> (Jacq.) Gaertn. (Talinaceae, 793, 961)                                   | America             | Medicine     | Postpartum recovery, Tonic                                                        | Cooked by boiled with chicken soup for orally eaten                |
| <i>Tradescantia zebrina</i> Bosse<br>(Commelinaceae, 701, 716, 799, 959)                            | America             | Medicine     | Amenorrhoea, Fever, Relief muscle pain                                            | Decoction for orally drinking                                      |
|                                                                                                     |                     |              | Food allergic reaction                                                            | Hot infusion for orally drinking                                   |
|                                                                                                     |                     |              | Postpartum recovery, Tonic                                                        | Cooked by boiled with chicken soup for orally eaten                |
|                                                                                                     |                     |              | Sprain (strain)                                                                   | Pound for topical use by poultice                                  |
| <i>Verbena officinalis</i> L.<br>(Verbenaceae, 605, 794)                                            | Europe              | Medicine     | Fever                                                                             | Decoction for orally drinking                                      |
|                                                                                                     |                     |              | Foot dermatitis, Itchy rash                                                       | Crush for topical use by liniment or decoction for bath            |

| <b>Scientific name</b> (Family and Varangrat Nguanchoo voucher number, all deposited in the QBG herbarium) | <b>Geographic origin</b> | <b>Use category</b> | <b>Application/ Treatment</b>                         | <b>Preparation and application</b>                     |
|------------------------------------------------------------------------------------------------------------|--------------------------|---------------------|-------------------------------------------------------|--------------------------------------------------------|
|                                                                                                            |                          |                     | Itchy rash                                            | Pound & mixed with hot oil for topical use by liniment |
| <i>Zea mays</i> L. (Poaceae, -)                                                                            | America                  | Food                | Carbohydrate source                                   | Boiled                                                 |
| <i>Zephyranthes carinata</i> Herb. (Amaryllidaceae, 819, 828)                                              | America                  | Medicine            | Diarrhea (children), Epilepsy, Food allergic reaction | Hot infusion for orally drinking                       |
|                                                                                                            |                          |                     | Food for pregnant                                     | Cooked by mixed with egg and steamed for orally eaten  |
|                                                                                                            |                          | Social use          | Sacred plant                                          | Protecting from evil spirit by putted in pouch         |
| <i>Ziziphus jujuba</i> Mill. (Rhamnaceae, 730)                                                             | Europe to China          | Food                | Fruit                                                 | Raw                                                    |
